# Supplementary material for: Understanding interactions between risk factors, and assessing the utility of the additive and multiplicative models through simulations
Source: PubMed Central journal article supplement (PMC8075235; doi:10.1371/journal.pone.0250282), 2021-04-26
Supplement: pone.0250282.s002.pdf [file pone.0250282.s002.pdf]

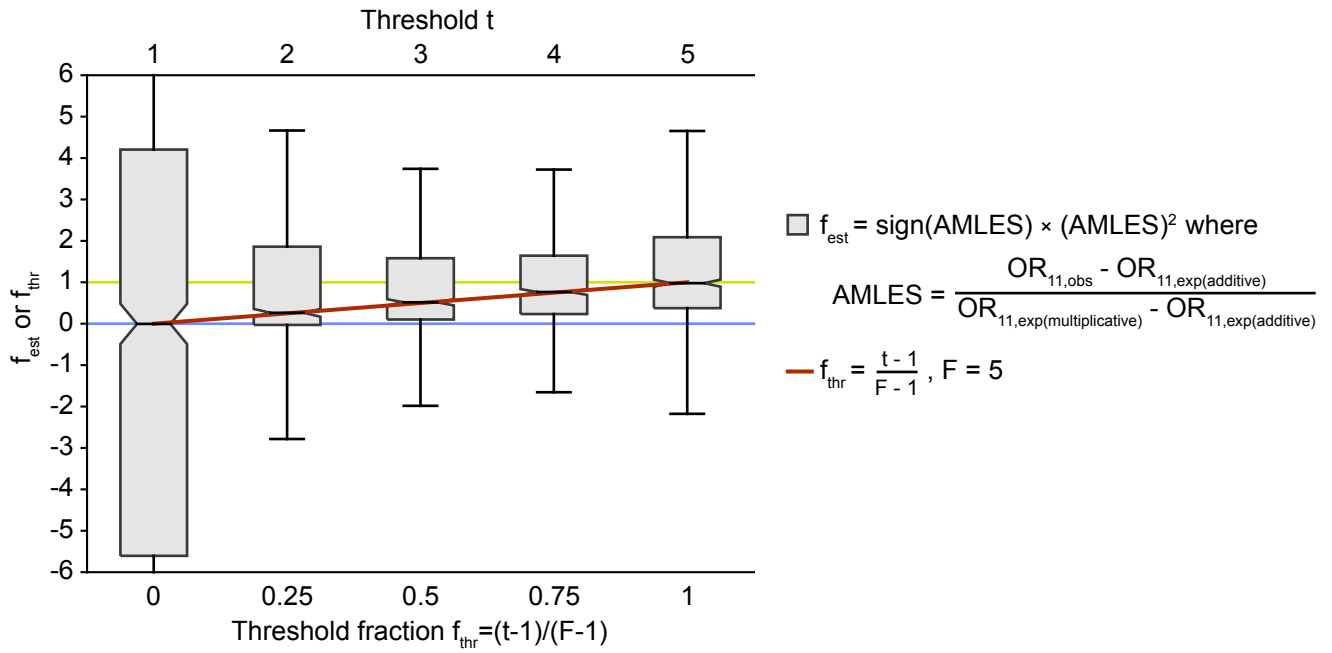

**S2 Fig. Multifactorial threshold model with  $f_{\text{est}}$  metric.** The y axis is the signed square of the y axis in Fig 2A, otherwise this is the same plot, i.e. based on the scenario in Fig 1C. The red curve is the threshold fraction; this and  $f_{\text{est}}$  make up the y axis. Notched in the box plots show bootstrapped 95% confidence intervals for the medians. The simulation had 0.5% cases and the rest controls, with a range  $\pm 0.04\%$ .
