# Supplementary material for: Understanding interactions between risk factors, and assessing the utility of the additive and multiplicative models through simulations
Source: PubMed Central journal article supplement (PMC8075235; doi:10.1371/journal.pone.0250282), 2021-04-26
Supplement: pone.0250282.s003.pdf [file pone.0250282.s003.pdf]

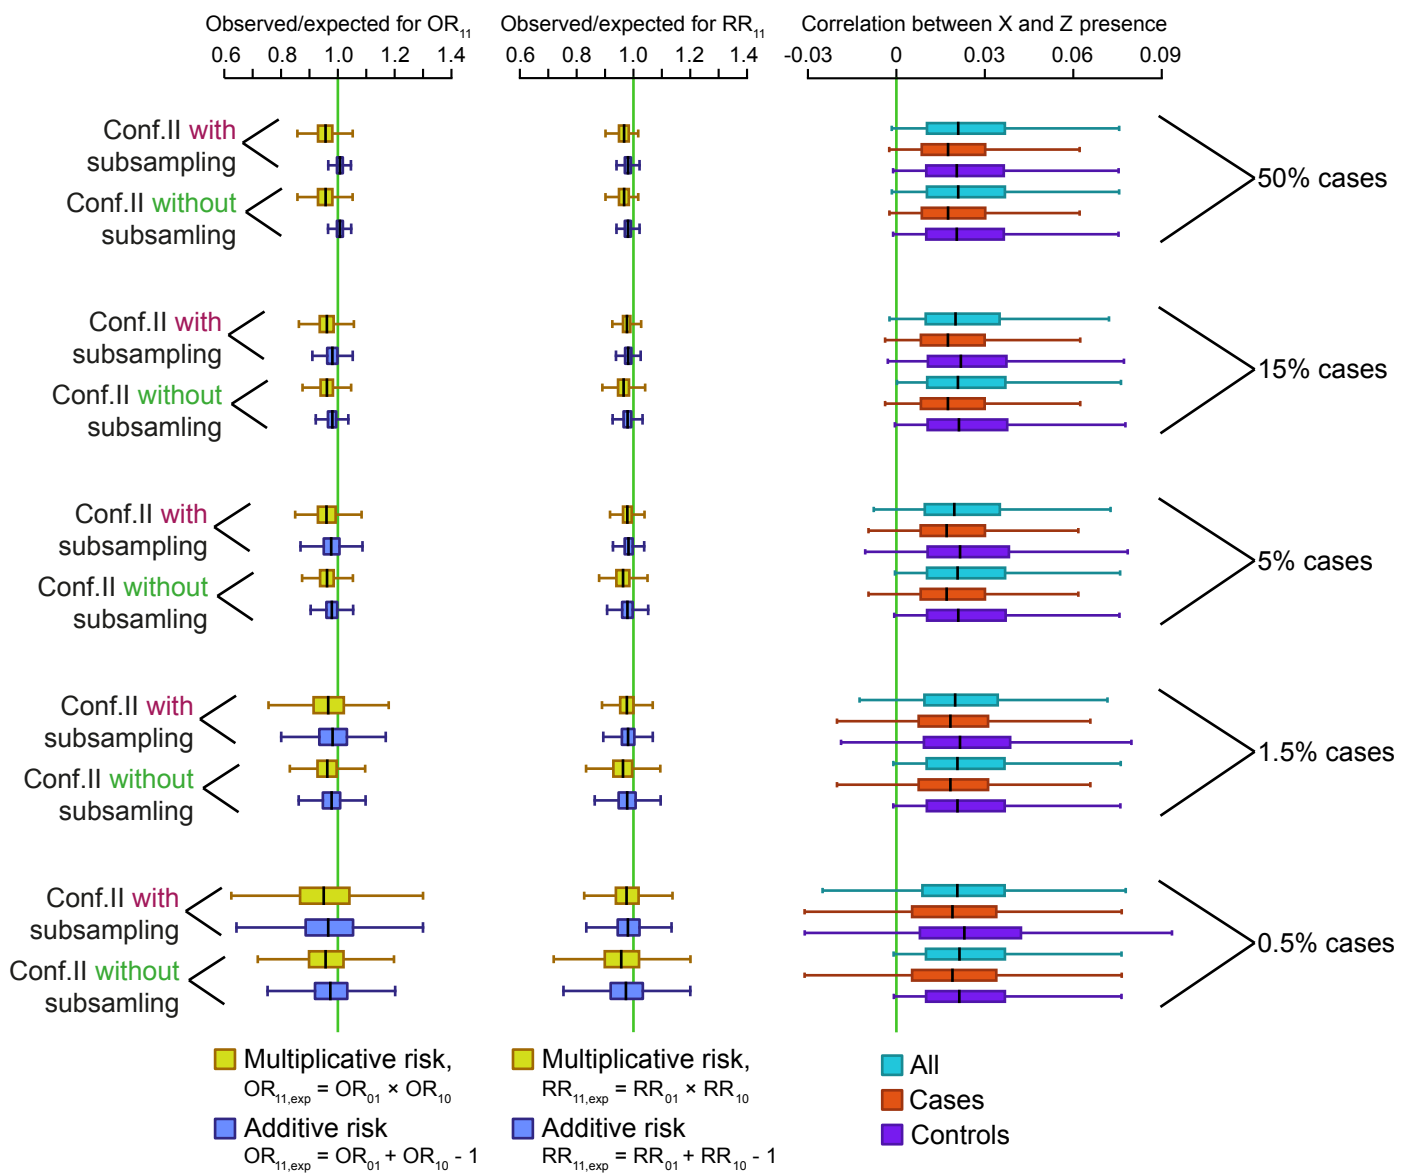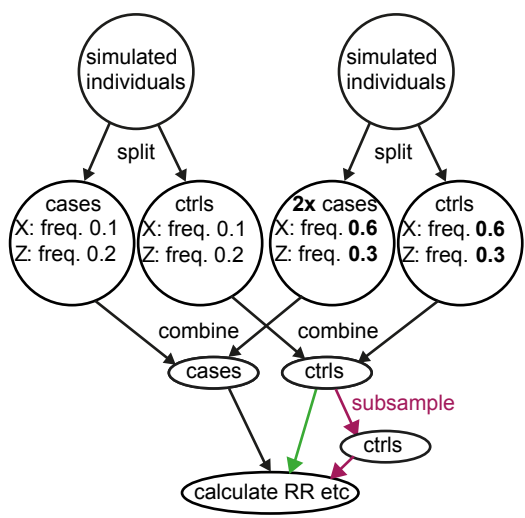

**S3 Fig. No apparent difference from subsampling to equal number of controls and cases in Confounder II.** As in the scheme to the left, we simulated with (purple arrows) or without (green arrow) a step that reduced the number of controls to the same as the number of cases. As can be seen in the box plots above, this does not appear to have any effect on the results.
